# Supplementary material
Source: PubMed Central journal article supplement (PMC5457700)
Supplement: NIHMS853583-supplement-supplement_1.pdf [file NIHMS853583-supplement-supplement_1.pdf]

## Supplementary material

**Table S1. Regression coefficients ( $\times 10^{-3}$ )<sup>a</sup> between nutrient intake and urinary arsenic metabolites: sensitivity analysis including only values above the limit of detection**

| Nutrients (units)             | %iAs<br>(n=391) | %MMA<br>(n=391) | %DMA<br>(n=391) | MMA/iAs<br>(n=391) | DMA/MMA<br>(n=1004) | DMA/iAs<br>(n=391) |
|-------------------------------|-----------------|-----------------|-----------------|--------------------|---------------------|--------------------|
| Retinol ( $\mu\text{gRE}$ )   | -0.13           | 0.02            | 0.03            | 0.15               | 0.01                | 0.16               |
| Vitamin C (mg)                | -1.63*          | -0.25           | 0.19            | 1.38               | 0.16                | 1.82*              |
| $\alpha$ -tocopherol (mg)     | -22.70*         | 13.20           | 3.32            | 35.90**            | -2.50               | 26.00*             |
| Thiamin (mg)                  | -176.00*        | -102.00         | 25.20           | 73.40              | 44.30               | 201.00*            |
| Riboflavin (mg)               | -224.00**       | 18.30           | 48.90*          | 243.00**           | -8.82               | 273.00**           |
| Niacin (mg)                   | -20.80          | -20.30*         | 2.37            | 0.47               | 6.64                | 23.10              |
| Vitamin B6 (mg)               | 69.90           | 31.50           | -27.30          | -38.50             | -49.10              | -97.20             |
| Folate (400 $\mu\text{g}$ )   | -0.60*          | -0.14           | 0.11            | 0.47               | 0.19                | 0.71*              |
| Vitamin B12 ( $\mu\text{g}$ ) | -21.00*         | 0.08            | 4.19            | 21.10              | 6.47                | 25.20*             |
| Choline (mg)                  | -0.64*          | 0.10            | 0.18            | 0.74*              | 0.22                | 0.82*              |
| Methionine (g)                | -285.00*        | -11.30          | 67.00           | 274.00             | 97.90               | 353.00             |
| Betaine (mg)                  | 0.25            | -0.60           | 0.05            | -0.86              | 0.68                | -0.20              |
| Calcium (mg)                  | -0.07           | 0.26            | -0.03           | 0.33               | -0.33**             | 0.03               |
| Phosphorus (mg)               | 0.19*           | 0.05            | -0.04           | -0.14              | -0.07               | -0.23              |
| Magnesium (mg)                | 0.83*           | 0.12            | -0.16           | -0.71              | -0.19               | -0.99              |
| Iron (mg)                     | -31.00*         | -26.30*         | 6.19            | 4.71               | 21.8**              | 37.20*             |
| Zinc (mg)                     | 5.48            | -13.50          | -1.50           | -19.00             | 27.3**              | -6.98              |
| Copper (mg)                   | -51.50          | -21.50          | 12.10           | 30.00              | 40.00               | 63.60              |
| Sodium (mg)                   | -0.08*          | 0.00            | 0.02            | 0.08               | 0.03                | 0.10*              |
| Potassium (mg)                | -0.06           | 0.03            | 0.00            | 0.09               | 0.00                | 0.06               |
| Selenium ( $\mu\text{g}$ )    | -4.00*          | -1.29           | 0.80            | 2.71               | 1.71                | 4.80*              |

\*  $p < 0.05$ , \*\*  $p < 0.01$ , \*\*\*  $p < 0.001$

<sup>a</sup> Each model contains only one nutrient adjusted by age (years), total energy intake (kcal/day) and TAs-AsB ( $\mu\text{g/l}$ ); beta coefficients are log transformed
